# Supplementary material for: Synthesis, characterization and chemical bonding analysis of the quaternary cyanamides Li2MnHf2(NCN)6 and Li2MnZr2(NCN)6
Source: Royal Society of Chemistry journal article supplement (doi:10.1039/d4dt02615b), 2024-01-01
Supplement: d4dt02615b1.pdf [file d4dt02615b1.pdf]

# Synthesis, Characterization and Chemical Bonding Analysis of the Quaternary Cyanamides $\text{Li}_2\text{MnHf}_2(\text{NCN})_6$ and $\text{Li}_2\text{MnZr}_2(\text{NCN})_6$

Hicham Bourakhouadar,<sup>a</sup> Juan Medina-Jurado,<sup>a</sup> Peter C. Müller,<sup>a</sup> Alex J. Corkett<sup>\*a</sup> and Richard Dronskowski<sup>\*a</sup>

<sup>a</sup>Chair of Solid-State and Quantum Chemistry, Institute of Inorganic Chemistry, RWTH Aachen University, 52056 Aachen, Germany

## Supporting Information

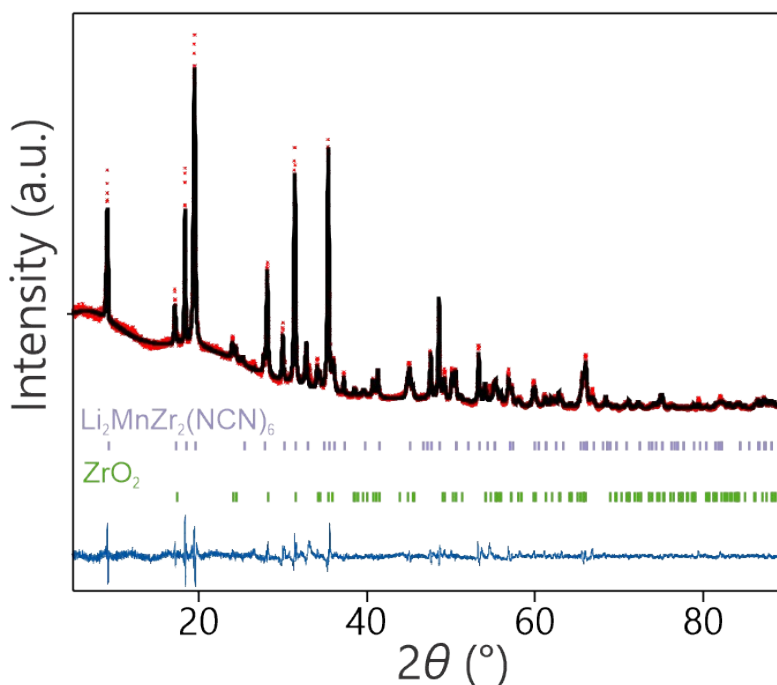

**Figure S1.** Rietveld fit of  $\text{Li}_2\text{MnZr}_2(\text{NCN})_6$  to PXRD data ( $\text{Cu K}\alpha_1$ ), showing observed (red), calculated (black) and difference (blue) intensities. Bragg positions of  $\text{Li}_2\text{MnZr}_2(\text{NCN})_6$  (violet) and 20.1(1) wt%  $\text{ZrO}_2$  baddeleyite  $P2_1/c$  (blue) are denoted by vertical markers.

**Table S1.** CHN results of  $\text{Li}_2\text{MnHf}_2(\text{NCN})_6$  using  $\text{ZnNCN}$  and  $\text{Li}_2\text{MnZr}_2(\text{NCN})_6$  compared to theoretical values corrected for the presence of  $\text{HfO}_2$  and  $\text{ZrO}_2$ .

|                                          |                      | C    | H | N    |
|------------------------------------------|----------------------|------|---|------|
| $\text{Li}_2\text{MnHf}_2(\text{NCN})_6$ | Theoretical (wt. %)  | 9.9  | 0 | 23.2 |
|                                          | Experimental (wt. %) | 8.8  | 0 | 18.9 |
| $\text{Li}_2\text{MnZr}_2(\text{NCN})_6$ | Theoretical (wt. %)  | 12.8 | 0 | 29.9 |
|                                          | Experimental (wt. %) | 12.9 | 0 | 26.3 |

**Table S2.** Crystallographic data and fractional coordinates for  $\text{Li}_2\text{MnZr}_2(\text{NCN})_6$ .<sup>a</sup>

| Atom |           | <i>x</i>      | <i>y</i>      | <i>z</i>      | <i>occ.</i> | $U_{\text{iso}}$<br>( $10^2 \text{ \AA}^2$ ) |
|------|-----------|---------------|---------------|---------------|-------------|----------------------------------------------|
| Li1  | <i>2d</i> | $\frac{1}{3}$ | $\frac{2}{3}$ | $\frac{1}{2}$ | 0.944(1)    | 0.92(4)                                      |
| Zr2  | <i>2d</i> | $\frac{1}{3}$ | $\frac{2}{3}$ | $\frac{1}{2}$ | 0.056(1)    | 0.92(4)                                      |
| Mn   | <i>1b</i> | 0             | 0             | $\frac{1}{2}$ | 1           | 1.38(14)                                     |
| Zr1  | <i>2c</i> | $\frac{1}{3}$ | $\frac{2}{3}$ | 0             | 0.944(1)    | 0.92(4)                                      |
| Li2  | <i>2c</i> | $\frac{1}{3}$ | $\frac{2}{3}$ | 0             | 0.056(1)    | 0.92(4)                                      |
| N1   | <i>6k</i> | 0.5945(15)    | 0             | 0.8687(7)     | 1           | 2.9(2)                                       |
| N2   | <i>6k</i> | 0.3217(14)    | 0             | 0.3849(8)     | 1           | 2.9(2)                                       |
| C    | <i>6k</i> | 0.628(3)      | 0             | 0.736(1)      | 1           | 2.9(2)                                       |

Trigonal,  $P\bar{3}1m$  (No. 162),  $Z = 1$ ,  $a = 5.94791(12) \text{ \AA}$ ,  $c = 9.6403(3) \text{ \AA}$ ;  $R_{\text{wp}} = 5.84\%$ ,  $R_{\text{p}} = 4.14\%$ ,  $\chi^2 = 4.647$ ,  $R_{\text{wpb}} = 8.45 \%$

<sup>a</sup> Standard deviations are given in parentheses.
